# Supplementary material
Source: publisher figshare collection journal article supplement (https://diabetesjournals.figshare.com/articles/dataset/_/24208890)
Supplement: Supplementary file 2 [file 1]

## **Focus Group Guide**

**The following questions are referring to your experience in clinic:**

### **Awareness/Readiness**

1. How familiar do you feel with the various autoantibody screening tools available to you and your clinic?
2. In clinic practice, how often do you discuss autoantibody screening...
  - With patients? (Newly diagnosed and/or other patients)
  - With patients' family members?
  - With other providers and staff?

### **General Perceptions...**

#### **Perceived benefits of antibody screening**

3. As a health care provider (HCP), what do you consider to be some benefits of screening?  
Potential probes:
  - Prevent DKA/hospitalization
  - Early diabetes management made easier (education, locating resources)
  - Ability to intervene in disease earlier
  - Potential prevention therapeutics to delay/prevent onset
  - Participate in clinic trials
4. After sharing the benefits of screening, and hearing others' perspectives, what would you say are the most impactful benefits of screening?

#### **Perceived drawbacks/barriers of antibody screening**

5. As a Health Care Provider, what do you consider downsides or barriers to autoantibody screening for you or your clinic? (Examples: Your clinic workflow/time with patient; your clinic resources, etc.)
6. From your perspective, are there additional barriers that you foresee with your patients when it comes to autoantibody screening? (Examples: patient attitudes towards screening, insurance costs, etc.)
  - Potential probes: Patient-specific
    - Anxiety or stress for patients/family members
    - High cost/ lack of insurance coverage
    - Low access to screenings
    - Lack of motivation from parents/family

- Potential probes: Clinic-specific
    - No designated clinic workflow for screening/provider-patient communications
      - Time during clinic, seeing patients and additional appointments
    - Follow-up resources in place after screening results received
    - Care coordination
7. After sharing the downsides/barriers to screening, and hearing others' perspectives, what would you say are the most impactful barriers to screening?

#### **Attitudes/beliefs about screening**

8. Who do you think would benefit most to be screened for autoantibodies?
9. Who do you think would benefit least or not see benefits for screening?
10. How do you think your attitude towards recommending screening would change if a treatment became available to delay/prevent the onset of T1D?

#### **Direct clinic experience...**

11. What is your clinic workflow, if any, after patients receive their results?
  - Do you have follow-up education/programs to support families after they receive their results?

#### **Comfort with communicating about antibody screening with patients and families**

12. If a family member asked you about autoantibody screening today, how confident/comfortable would you be describing the available tools? Recommending autoantibody screening and educating patients families?

Potential probes:

- Adult providers (Adults with no kids but future, adults with kids now, adults with siblings)
  - Pediatric providers (to parents with other children besides the patient)
13. How confident do you feel sharing and discussing results with patients/families:
    - If you do not feel comfortable sharing these results, who or where would you recommend patients go for more information/support?
    - Are there specific patient populations that you feel more (or less) comfortable discussing screening results with?
    - Does your communication method/approach vary based on the results/emotional state of the family? (For example: uncertain vs curious vs motivated)
    - How would your communication change, if at all, if one of your patients had multiple antibodies vs. one vs. none?

**Normative beliefs about screening**

14. What is the general attitude in your clinic among providers regarding autoantibody screening?

- General practice/primary care
