# Supplementary material
Source: publisher figshare collection journal article supplement (https://diabetesjournals.figshare.com/articles/dataset/_/24208890)
Supplement: Supplementary file 3 [file 1]

**Supplementary Table 1. COREQ Checklist**

| Topic                                          | Item Number | Guide Questions/Description                                                                              | Reported on Page No. |
|------------------------------------------------|-------------|----------------------------------------------------------------------------------------------------------|----------------------|
| <b>Domain 1: Research team and reflexivity</b> |             |                                                                                                          |                      |
| Personal characteristics                       |             |                                                                                                          |                      |
| Interviewer/facilitator                        | 1           | Which author/s conducted the interview or focus group?                                                   | Page 5               |
| Credentials                                    | 2           | What were the researcher's credentials? E.g. PhD, MD                                                     | Page 1               |
| Occupation                                     | 3           | What was their occupation at the time of the study?                                                      | Page 5               |
| Gender                                         | 4           | Was the researcher male or female?                                                                       | N/A                  |
| Experience and training                        | 5           | What experience or training did the researcher have?                                                     | Page 5               |
| <i>Relationship with participants</i>          |             |                                                                                                          |                      |
| Relationship established                       | 6           | Was a relationship established prior to study commencement?                                              | N/A                  |
| Participant knowledge of the interviewer       | 7           | What did the participants know about the researcher? e.g. personal goals, reasons for doing the research | N/A                  |

|                                       |    |                                                                                                                                                          |                               |
|---------------------------------------|----|----------------------------------------------------------------------------------------------------------------------------------------------------------|-------------------------------|
| Interviewer characteristics           | 8  | What characteristics were reported about the inter viewer/facilitator? e.g. Bias, assumptions, reasons and interests in the research topic               | N/A                           |
| <b>Domain 2: Study Design</b>         |    |                                                                                                                                                          |                               |
| <i>Theoretical Framework</i>          |    |                                                                                                                                                          |                               |
| Methodological orientation and theory | 9  | What methodological orientation was stated to underpin the study? e.g. grounded theory, discourse analysis, ethnography, phenomenology, content analysis | Mixed method/content analysis |
| <i>Participant Selection</i>          |    |                                                                                                                                                          |                               |
| Sampling                              | 10 | How were participants selected? e.g. purposive, convenience, consecutive, snowball                                                                       | Page 5                        |
| Method of approach                    | 11 | How were participants approached? e.g. face-to-face, telephone, mail, email                                                                              | Page 5                        |
| Sample Size                           | 12 | How many participants were in the study?                                                                                                                 | Page 5                        |
| Non-Participation                     | 13 | How many people refused to participate or dropped out? Reasons?                                                                                          | N/A                           |
| <i>Setting</i>                        |    |                                                                                                                                                          |                               |
| Setting of data collection            | 14 | Where was the data collected? e.g. home, clinic, workplace                                                                                               | Page 5                        |

|                                        |    |                                                                                   |          |
|----------------------------------------|----|-----------------------------------------------------------------------------------|----------|
| Presence of non-participants           | 15 | Was anyone else present besides the participants and researchers?                 | Page 5   |
| Description of sample                  | 16 | What are the important characteristics of the sample? e.g. demographic data, date | Page 5   |
| <i>Data Collection</i>                 |    |                                                                                   |          |
| Interview guide                        | 17 | Were questions, prompts, guides provided by the authors? Was it pilot tested?     | Page 6   |
| Repeat Interviews                      | 18 | Were repeat inter views carried out? If yes, how many?                            | N/A      |
| Audio/Visual recording                 | 19 | Did the research use audio or visual recording to collect the data?               | Page 6   |
| Field notes                            | 20 | Were field notes made during and/or after the interview or focus group?           | Page 5/6 |
| Duration                               | 21 | What was the duration of the inter views or focus group?                          | Page 6   |
| Data saturation                        | 22 | Was data saturation discussed?                                                    | Page 6   |
| Transcriptions returned                | 23 | Were transcripts returned to participants for comment and/or correction?          | N/A      |
| <b>Domain 3: analysis and findings</b> |    |                                                                                   |          |
| <i>Data Analysis</i>                   |    |                                                                                   |          |

|                                |    |                                                                                                                                 |            |
|--------------------------------|----|---------------------------------------------------------------------------------------------------------------------------------|------------|
| Number of data coders          | 24 | How many data coders coded the data?                                                                                            | Page 6     |
| Description of the coding tree | 25 | Did authors provide a description of the coding tree?                                                                           | Page 6     |
| Derivation of theme            | 26 | Were themes identified in advance or derived from the data?                                                                     | Page 6     |
| Software                       | 27 | What software, if applicable, was used to manage the data?                                                                      | Page 6     |
| Participant Checking           | 28 | Did participants provide feedback on the findings?                                                                              | N/A        |
| <i>Reporting</i>               |    |                                                                                                                                 |            |
| Quotations presented           | 29 | Were participant quotations presented to illustrate the themes/findings? Was each quotation identified? e.g. participant number | Pages 6-11 |
| Data and finding consistent    | 30 | Was there consistency between the data presented and the findings?                                                              | Pages 6-11 |
| Clarity of major themes        | 31 | Were major themes clearly presented in the findings?                                                                            | Pages 6-13 |
| Clarity of minor themes        | 32 | Is there a description of diverse cases or discussion of minor themes?                                                          | Pages 6-13 |
